# Supplementary material for: TwinEQTL: ultrafast and powerful association analysis for eQTL and GWAS in twin studies
Source: Oxford University Press journal article supplement (doi:10.1093/genetics/iyac088), 2022-06-11

$a^2=0, c^2=0, nMZ=900, nDZ=100, nSg=100$

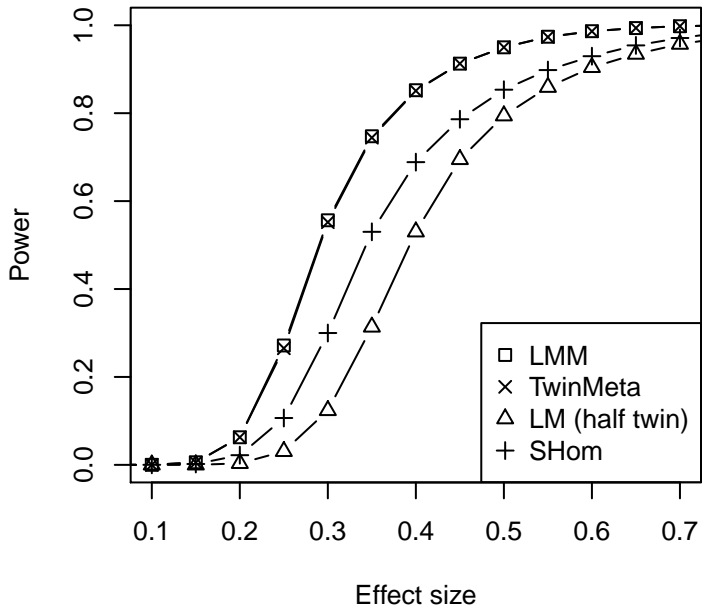

$a^2=0.2, c^2=0.1, nMZ=900, nDZ=100, nSg=100$

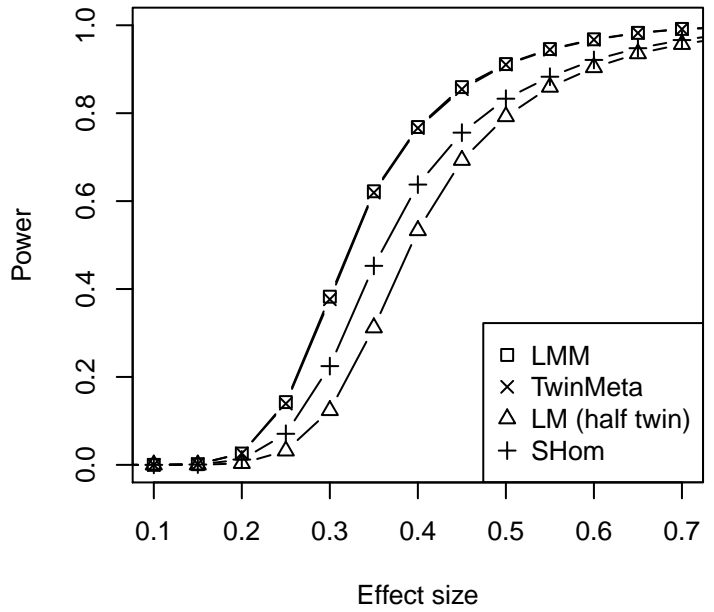

$a^2=0.5, c^2=0.1, nMZ=900, nDZ=100, nSg=100$

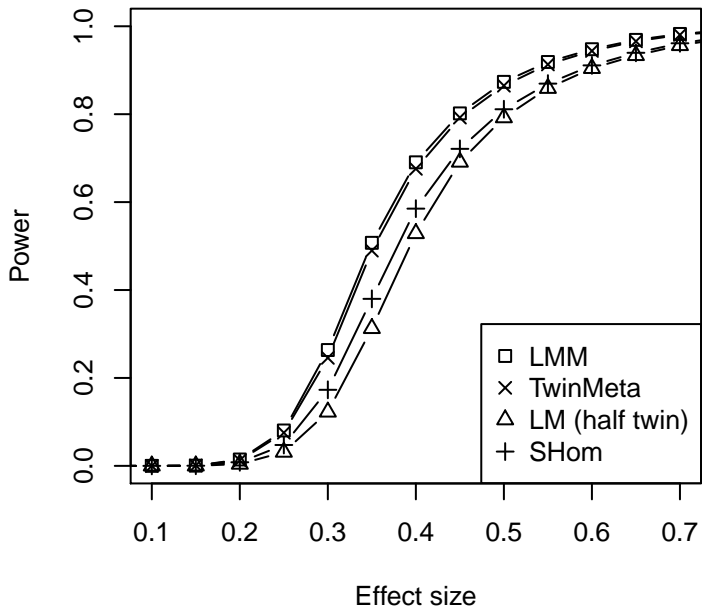

$a^2=0.7, c^2=0.2, nMZ=900, nDZ=100, nSg=100$

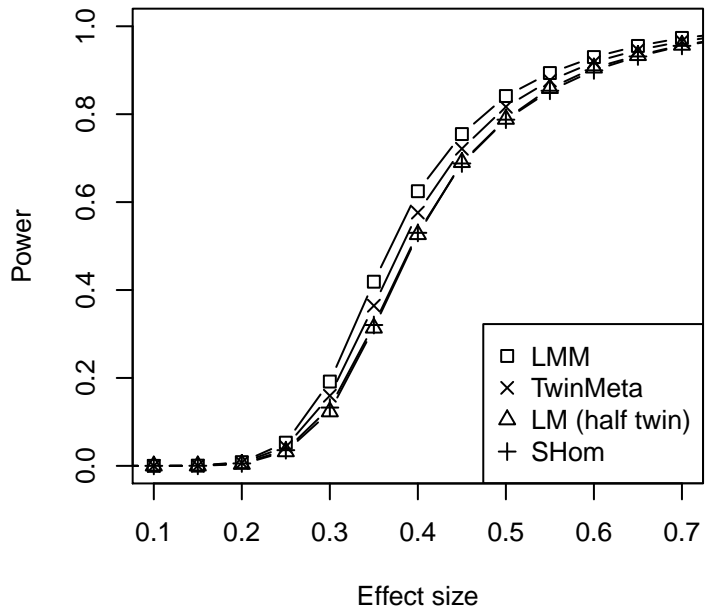

$a^2=0, c^2=0, nMZ=500, nDZ=500, nSg=100$

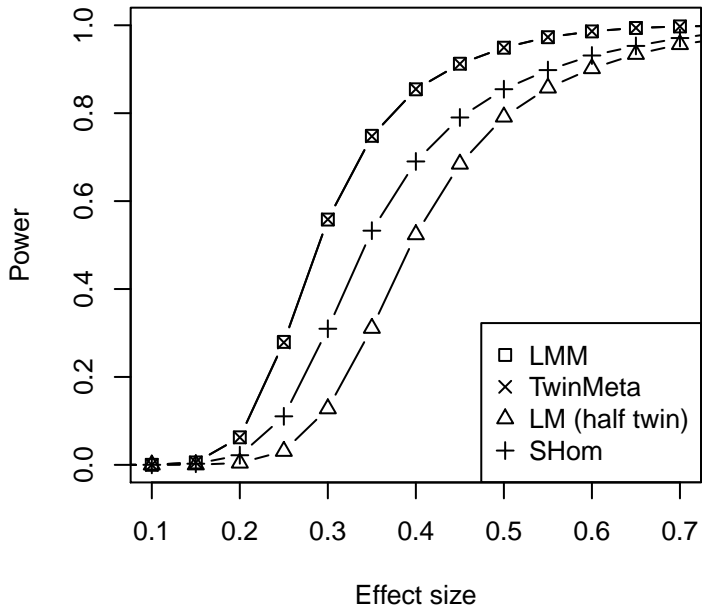

$a^2=0.2, c^2=0.1, nMZ=500, nDZ=500, nSg=100$

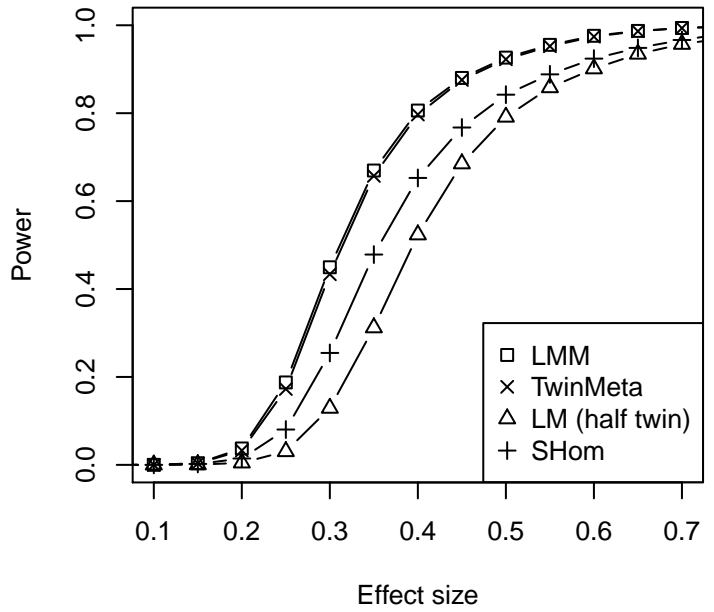

$a^2=0.5, c^2=0.1, nMZ=500, nDZ=500, nSg=100$

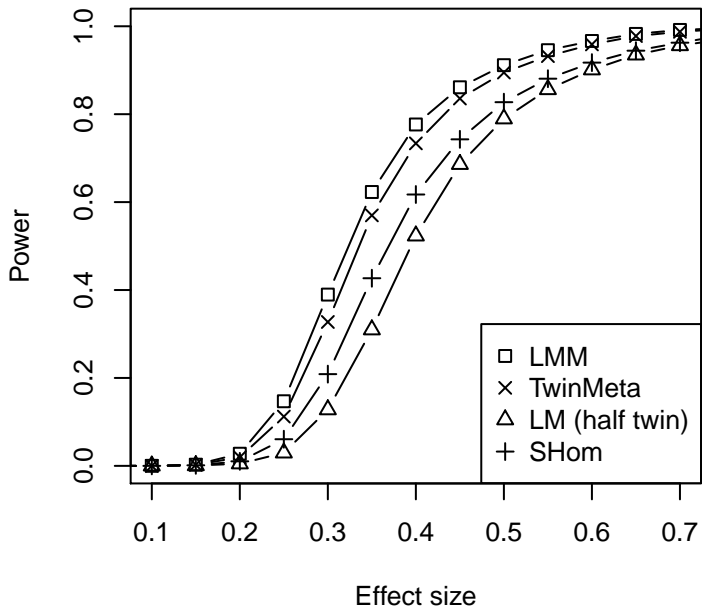

$a^2=0.7, c^2=0.2, nMZ=500, nDZ=500, nSg=100$

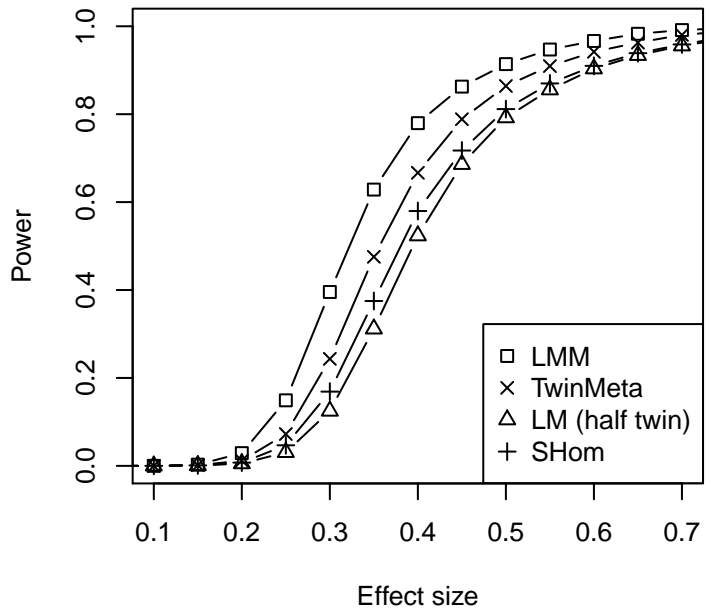

$a^2=0, c^2=0, nMZ=100, nDZ=900, nSg=100$

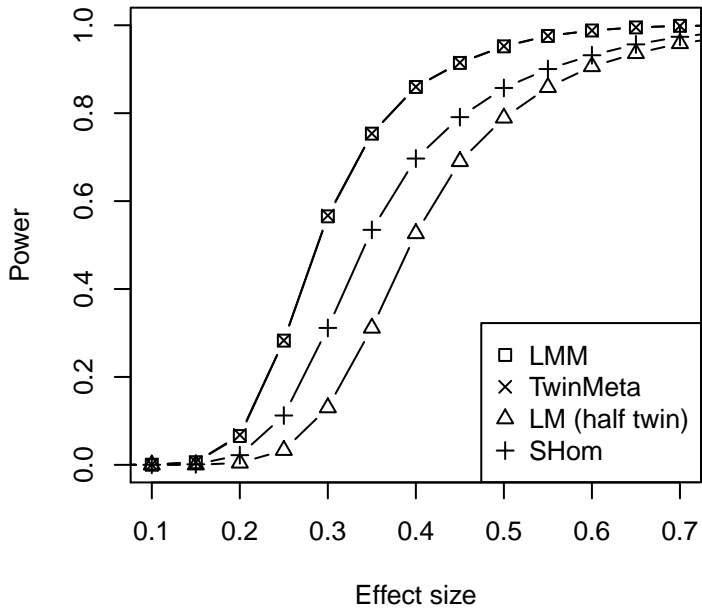

$a^2=0.2, c^2=0.1, nMZ=100, nDZ=900, nSg=100$

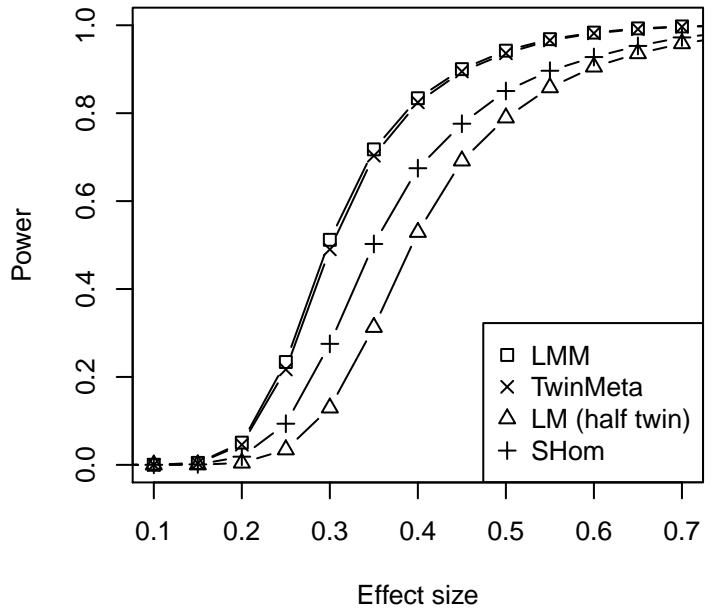

$a^2=0.5, c^2=0.1, nMZ=100, nDZ=900, nSg=100$

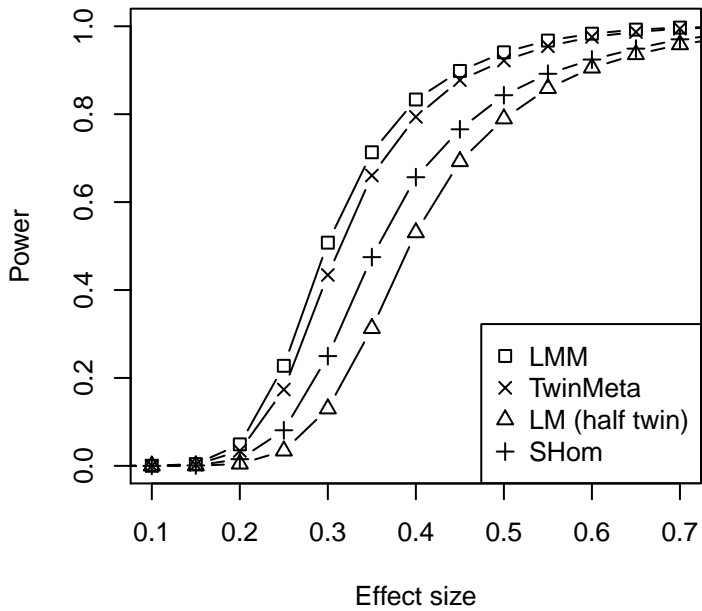

$a^2=0.7, c^2=0.2, nMZ=100, nDZ=900, nSg=100$

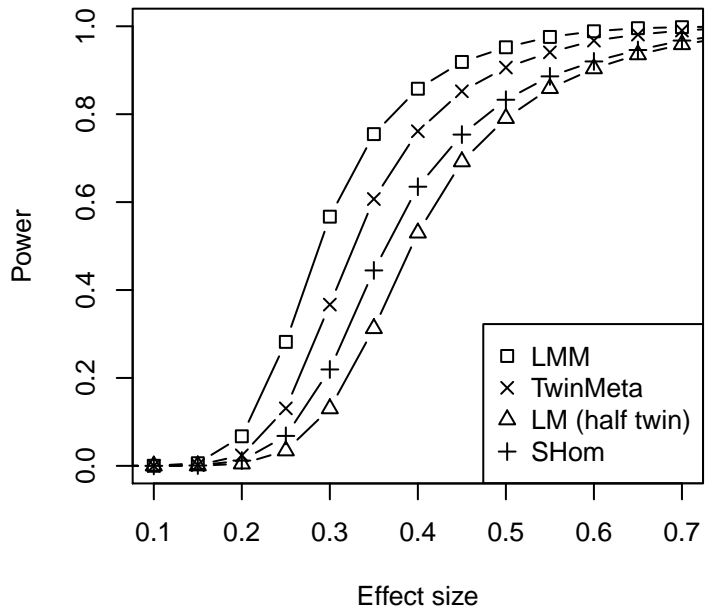

$a^2=0, c^2=0, nMZ=900, nDZ=100, nSg=1000$

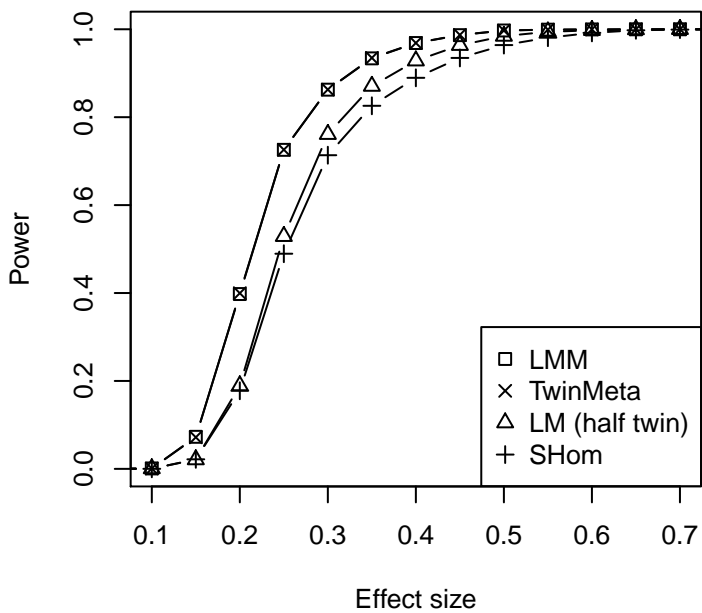

$a^2=0.2, c^2=0.1, nMZ=900, nDZ=100, nSg=1000$

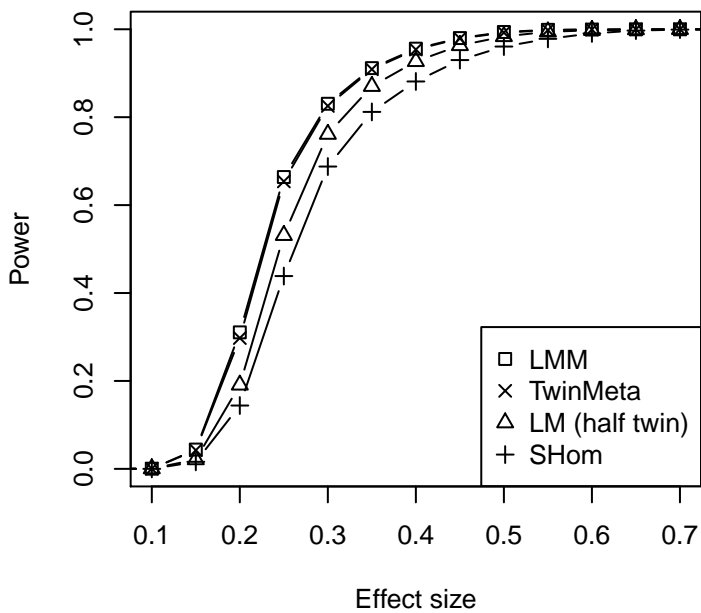

$a^2=0.5, c^2=0.1, nMZ=900, nDZ=100, nSg=1000$

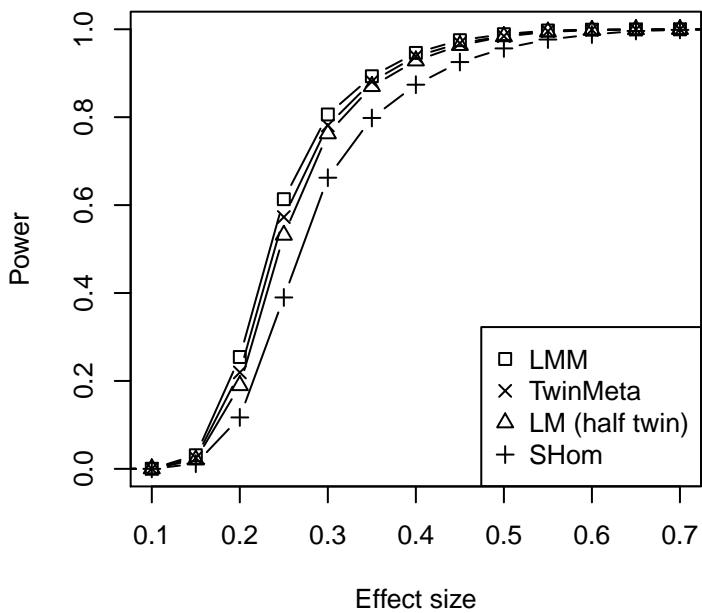

$a^2=0.7, c^2=0.2, nMZ=900, nDZ=100, nSg=1000$

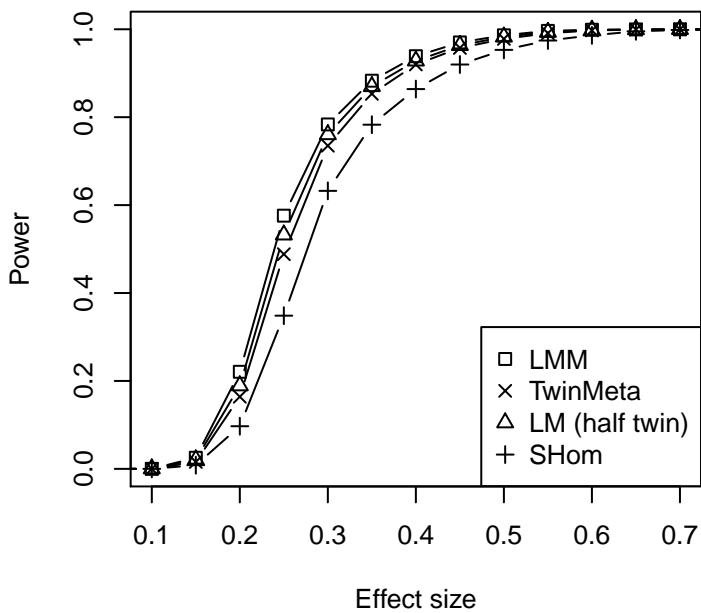

$a^2=0, c^2=0, nMZ=500, nDZ=500, nSg=1000$

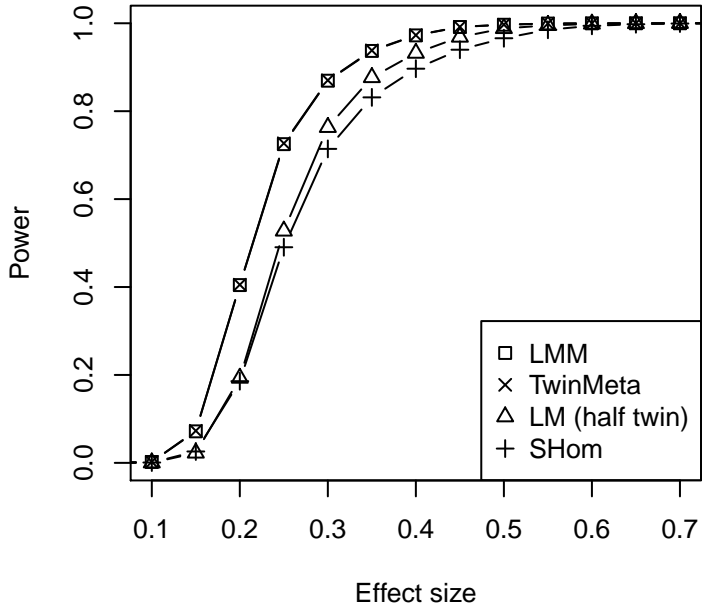

$a^2=0.2, c^2=0.1, nMZ=500, nDZ=500, nSg=1000$

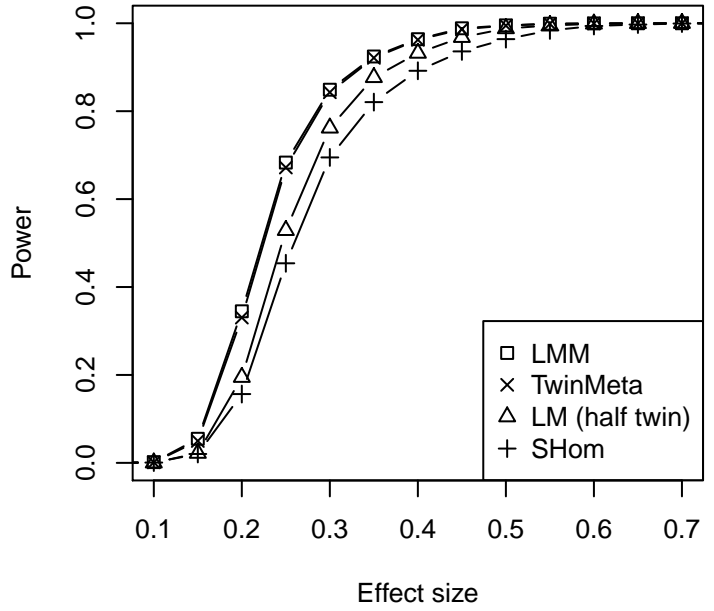

$a^2=0.5, c^2=0.1, nMZ=500, nDZ=500, nSg=1000$

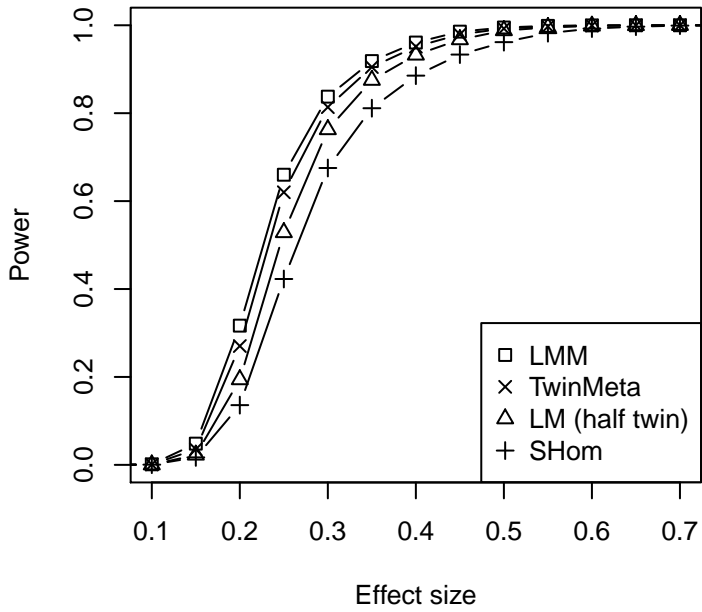

$a^2=0.7, c^2=0.2, nMZ=500, nDZ=500, nSg=1000$

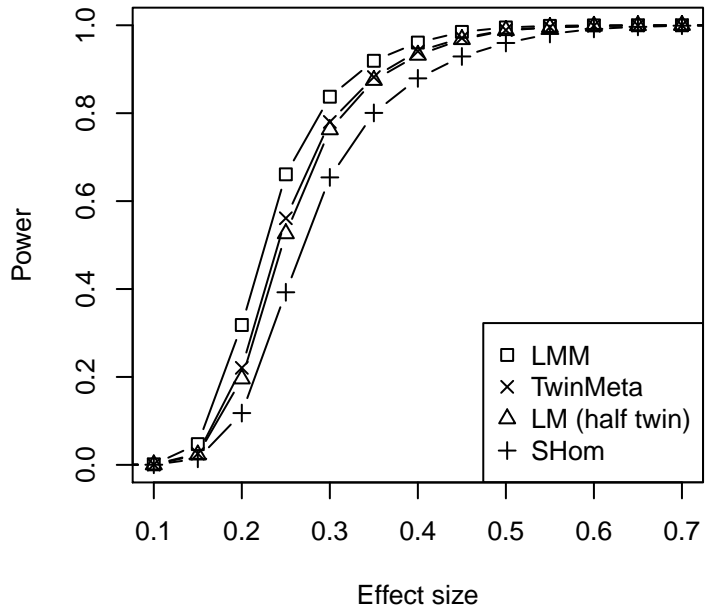

$a^2=0, c^2=0, nMZ=100, nDZ=900, nSg=1000$

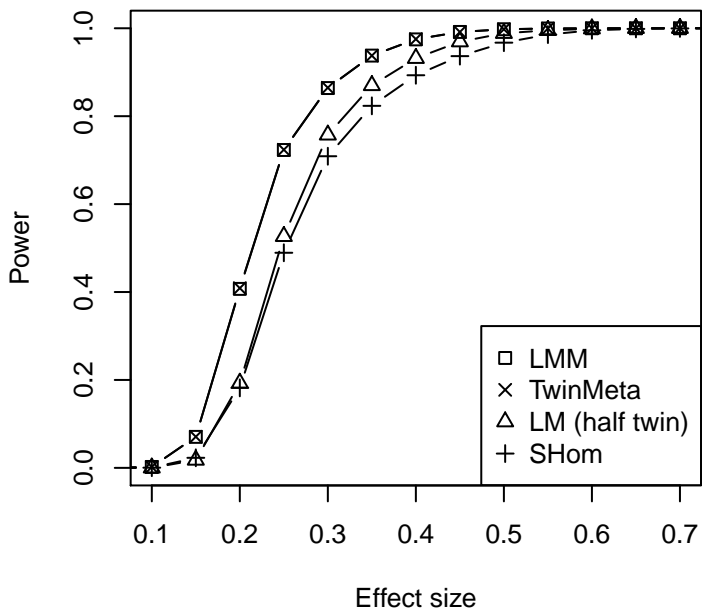

$a^2=0.2, c^2=0.1, nMZ=100, nDZ=900, nSg=1000$

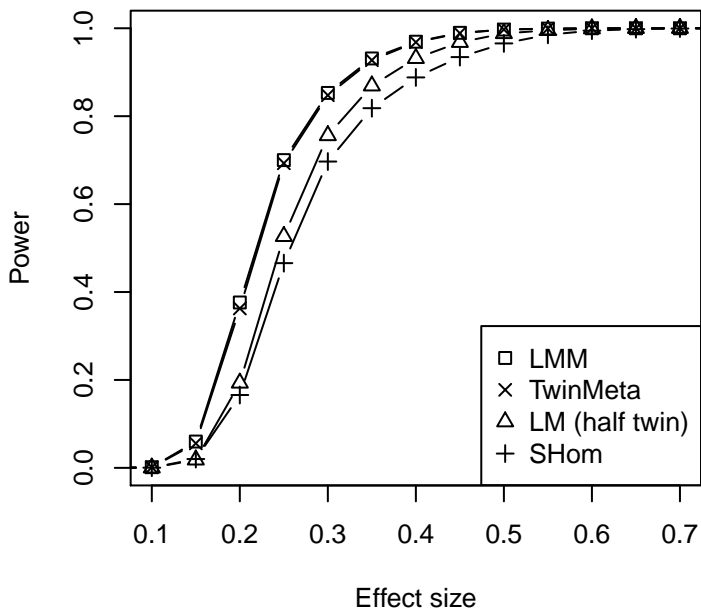

$a^2=0.5, c^2=0.1, nMZ=100, nDZ=900, nSg=1000$

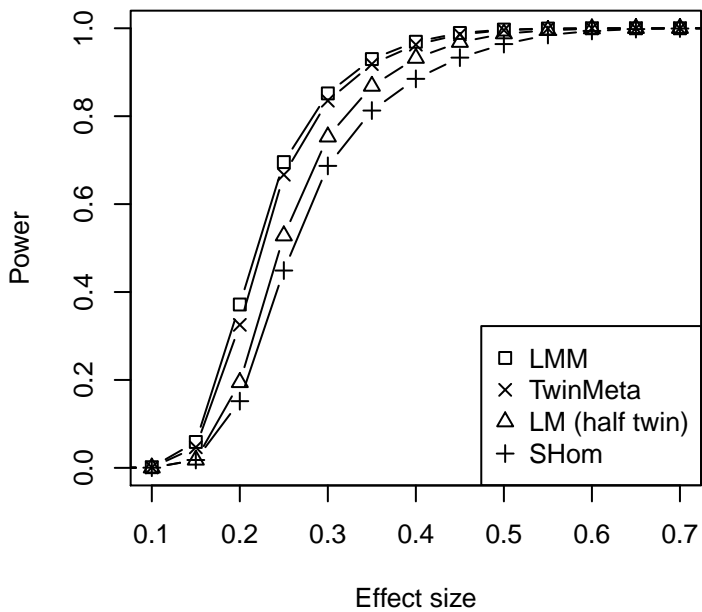

$a^2=0.7, c^2=0.2, nMZ=100, nDZ=900, nSg=1000$

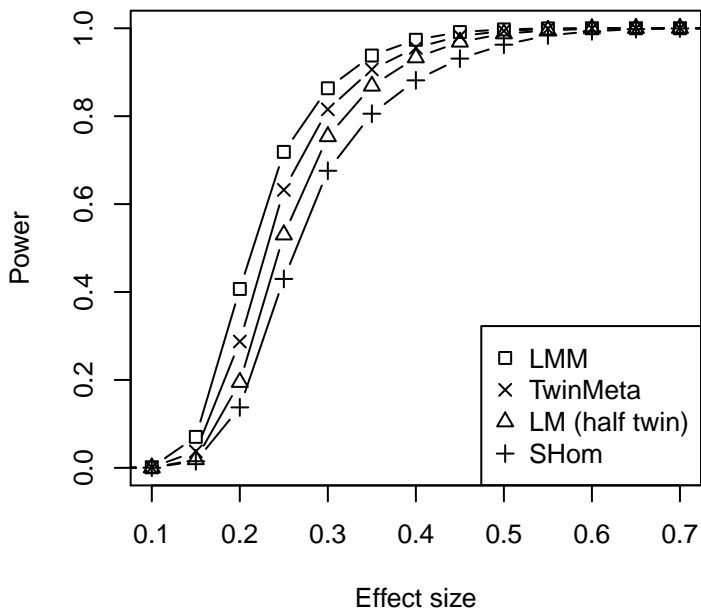

Supplement: iyac088_supplementary_data.pdf [file iyac088_supplementary_data.pdf]
